# Supplementary material for: Serially transplantable mammary epithelial cells express the Thy-1 antigen
Source: Springer Nature journal article supplement (doi:10.1186/s13058-018-1006-y), 2018-10-10

Figure S2

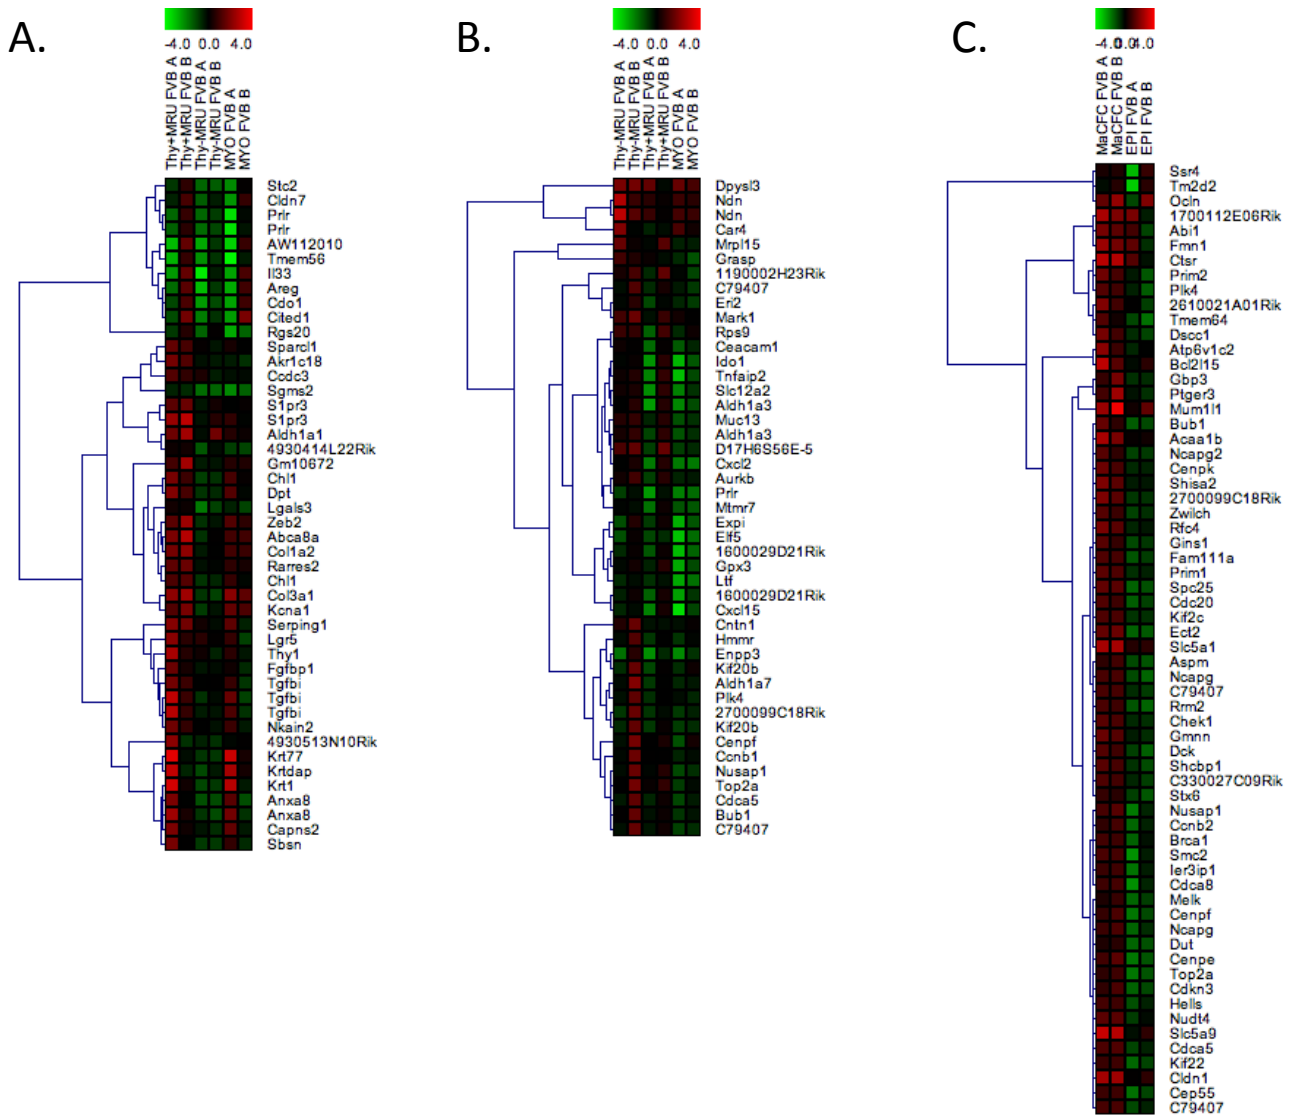

Supplement: MOESM2 [file 16189218]
