# Supplementary material for: Serially transplantable mammary epithelial cells express the Thy-1 antigen
Source: Springer Nature journal article supplement (doi:10.1186/s13058-018-1006-y), 2018-10-10

# Figure S4

A.

| Original Transplanted Population                                         | Engrafted/Transplanted | Efficiency |
|--------------------------------------------------------------------------|------------------------|------------|
| Lineage <sup>-</sup> 25K                                                 | 10/11                  | 91%        |
| Thy-1 <sup>med</sup> CD24 <sup>med</sup> CD49f <sup>high</sup> 600 cells | 5/6                    | 83%        |
| Thy-1 <sup>med</sup> CD24 <sup>med</sup> CD49f <sup>high</sup> 100 cells | 6/10                   | 60%        |
| Thy-1 <sup>med</sup> CD24 <sup>med</sup> CD49f <sup>high</sup> 30 cells  | 6/9                    | 67%        |
| Thy-1 <sup>hi</sup> CD24 <sup>med</sup> CD49f <sup>high</sup> 100 cells  | 6/8                    | 75%        |
| Thy-1 <sup>-</sup> CD24 <sup>med</sup> CD49f <sup>high</sup> cells       | 1/9                    | 11%        |

B.

| Original Transplanted Population                                         | Engrafted/Transplanted | Efficiency |
|--------------------------------------------------------------------------|------------------------|------------|
| Lineage <sup>-</sup> 25K                                                 | 14/14                  | 100%       |
| Thy-1 <sup>med</sup> CD24 <sup>med</sup> CD49f <sup>high</sup> 100 cells | 12/12                  | 100%       |

C.

Thy-1<sup>+</sup>CD24<sup>med</sup>CD49f<sup>high</sup>

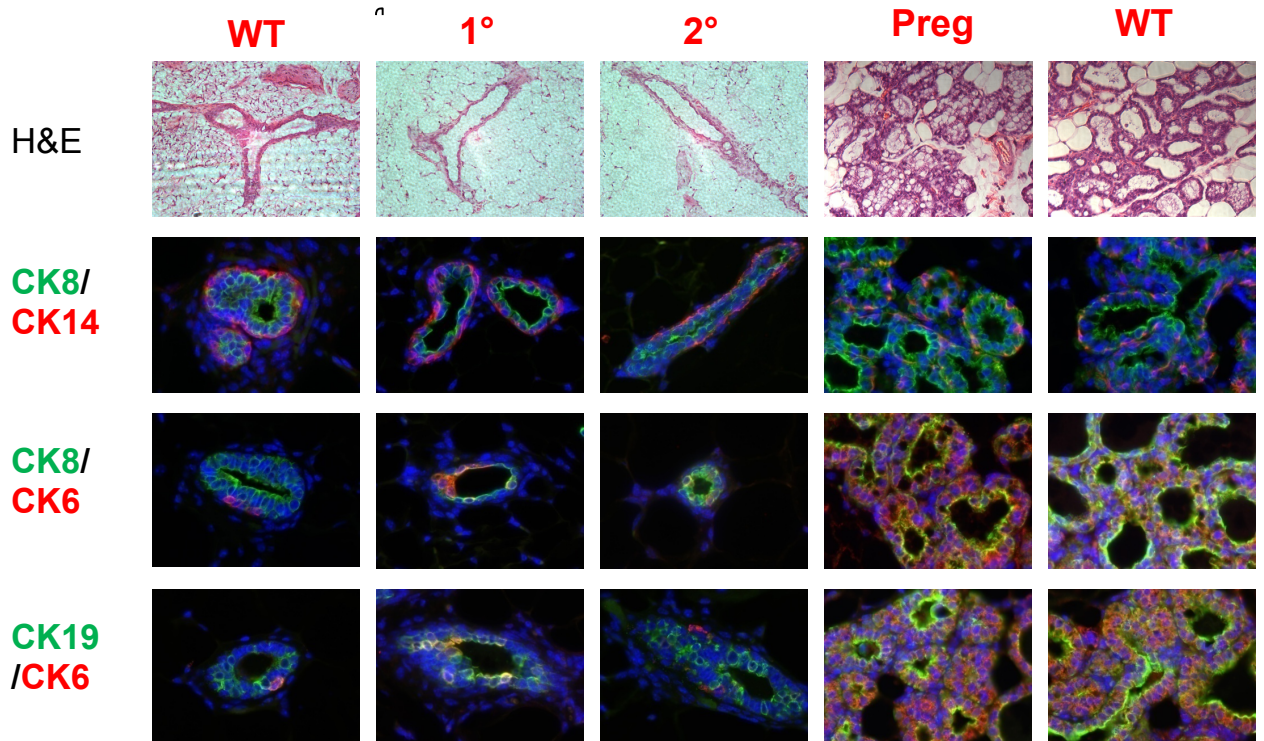

Supplement: MOESM5 [file 16189218]
